# Supplementary material for: In silico prediction of chemical subcellular localization via multi-classification methods
Source: Royal Society of Chemistry journal article supplement (doi:10.1039/c7md00074j), 2017-01-01
Supplement: c7md00074j1.pdf [file c7md00074j1.pdf]

## ***In silico* Prediction of Chemical Subcellular Localization via Multi-classification Methods**

Hongbin Yang, Xiao Li, Yingchun Cai, Qin Wang, Weihua Li, Guixia Liu, Yun Tang\*

*Shanghai Key Laboratory of New Drug Design, School of Pharmacy, East China University of  
Science and Technology, Shanghai 200237, China*

**Supplementary Table 1: Performance of models from 5-fold cross validation.**

| Feature | Method | Q <sub>total</sub> | Q <sub>1</sub> | Q <sub>2</sub> | Q <sub>3</sub> | Q <sub>4</sub> |
|---------|--------|--------------------|----------------|----------------|----------------|----------------|
| CDK     | kNN    | 0.709              | 0.720          | 0.616          | 0.778          | 0.830          |
| CDK     | SVM    | 0.756              | 0.705          | 0.811          | 0.728          | 0.739          |
| CDK     | ANN    | 0.747              | 0.720          | 0.753          | 0.765          | 0.761          |
| CDK     | RF     | 0.703              | 0.561          | 0.858          | 0.593          | 0.682          |
| CDK     | NB     | 0.529              | 0.621          | 0.463          | 0.506          | 0.557          |
| CDK     | CT     | 0.570              | 0.530          | 0.532          | 0.568          | 0.716          |
| SubFP   | kNN    | 0.686              | 0.705          | 0.653          | 0.654          | 0.761          |
| SubFP   | SVM    | 0.719              | 0.636          | 0.795          | 0.605          | 0.784          |
| SubFP   | ANN    | 0.69               | 0.674          | 0.684          | 0.617          | 0.795          |
| SubFP   | RF     | 0.599              | 0.455          | 0.937          | 0.099          | 0.545          |
| SubFP   | NB     | 0.625              | 0.621          | 0.647          | 0.506          | 0.693          |
| SubFP   | CT     | 0.646              | 0.576          | 0.637          | 0.580          | 0.830          |
| Estate  | kNN    | 0.703              | 0.629          | 0.721          | 0.691          | 0.784          |
| Estate  | SVM    | 0.705              | 0.667          | 0.768          | 0.593          | 0.727          |
| Estate  | ANN    | 0.684              | 0.629          | 0.732          | 0.617          | 0.727          |
| Estate  | RF     | 0.605              | 0.462          | 0.916          | 0.173          | 0.545          |
| Estate  | NB     | 0.603              | 0.583          | 0.632          | 0.531          | 0.636          |
| Estate  | CT     | 0.668              | 0.644          | 0.663          | 0.605          | 0.773          |
| Pubchem | kNN    | 0.711              | 0.697          | 0.674          | 0.765          | 0.761          |
| Pubchem | SVM    | 0.745              | 0.727          | 0.763          | 0.691          | 0.784          |
| Pubchem | ANN    | 0.713              | 0.682          | 0.716          | 0.716          | 0.75           |
| Pubchem | RF     | 0.692              | 0.682          | 0.747          | 0.593          | 0.682          |
| Pubchem | NB     | 0.560              | 0.545          | 0.605          | 0.519          | 0.523          |
| Pubchem | CT     | 0.648              | 0.568          | 0.663          | 0.642          | 0.739          |
| KRFP    | kNN    | 0.715              | 0.742          | 0.668          | 0.691          | 0.795          |
| KRFP    | SVM    | 0.753              | 0.674          | 0.832          | 0.679          | 0.773          |

|          |     |       |       |       |       |       |
|----------|-----|-------|-------|-------|-------|-------|
| KRFP     | ANN | 0.725 | 0.697 | 0.726 | 0.667 | 0.818 |
| KRFP     | RF  | 0.656 | 0.492 | 0.884 | 0.407 | 0.636 |
| KRFP     | NB  | 0.654 | 0.598 | 0.695 | 0.568 | 0.727 |
| KRFP     | CT  | 0.668 | 0.621 | 0.637 | 0.691 | 0.784 |
| MACCS    | kNN | 0.715 | 0.697 | 0.668 | 0.728 | 0.83  |
| MACCS    | SVM | 0.762 | 0.720 | 0.811 | 0.679 | 0.795 |
| MACCS    | ANN | 0.711 | 0.652 | 0.747 | 0.642 | 0.784 |
| MACCS    | RF  | 0.727 | 0.682 | 0.832 | 0.58  | 0.705 |
| MACCS    | NB  | 0.597 | 0.598 | 0.616 | 0.481 | 0.659 |
| MACCS    | CT  | 0.664 | 0.621 | 0.637 | 0.679 | 0.773 |
| Full_Des | kNN | 0.755 | 0.699 | 0.750 | 0.765 | 0.841 |
| Full_Des | SVM | 0.761 | 0.729 | 0.823 | 0.654 | 0.773 |
| Full_Des | NB  | 0.609 | 0.526 | 0.771 | 0.412 | 0.500 |
| Full_Des | RF  | 0.660 | 0.609 | 0.708 | 0.605 | 0.682 |
| Full_Des | ANN | 0.731 | 0.707 | 0.776 | 0.667 | 0.727 |
| Full_Des | CT  | 0.573 | 0.632 | 0.557 | 0.444 | 0.636 |
| CT_Des   | kNN | 0.707 | 0.682 | 0.753 | 0.593 | 0.750 |
| CT_Des   | SVM | 0.613 | 0.515 | 0.763 | 0.593 | 0.557 |
| CT_Des   | NB  | 0.599 | 0.507 | 0.653 | 0.482 | 0.625 |
| CT_Des   | RF  | 0.581 | 0.455 | 0.837 | 0.296 | 0.477 |
| CT_Des   | ANN | 0.715 | 0.720 | 0.711 | 0.630 | 0.796 |
| CT_Des   | CT  | 0.617 | 0.652 | 0.653 | 0.432 | 0.659 |
| F20_Des  | kNN | 0.637 | 0.667 | 0.647 | 0.556 | 0.648 |
| F20_Des  | SVM | 0.495 | 0.349 | 0.790 | 0.161 | 0.386 |
| F20_Des  | NB  | 0.430 | 0.409 | 0.384 | 0.309 | 0.671 |
| F20_Des  | RF  | 0.587 | 0.530 | 0.753 | 0.358 | 0.523 |
| F20_Des  | ANN | 0.640 | 0.545 | 0.768 | 0.432 | 0.693 |
| F20_Des  | CT  | 0.576 | 0.621 | 0.584 | 0.444 | 0.614 |
| F100_Des | kNN | 0.566 | 0.568 | 0.579 | 0.457 | 0.636 |
| F100_Des | SVM | 0.493 | 0.349 | 0.763 | 0.612 | 0.523 |
| F100_Des | NB  | 0.448 | 0.364 | 0.421 | 0.469 | 0.614 |
| F100_Des | RF  | 0.635 | 0.644 | 0.690 | 0.494 | 0.636 |
| F100_Des | ANN | 0.686 | 0.667 | 0.721 | 0.593 | 0.727 |
| F100_Des | CT  | 0.614 | 0.599 | 0.642 | 0.556 | 0.614 |
| GS_Des   | kNN | 0.705 | 0.644 | 0.711 | 0.716 | 0.773 |
| GS_Des   | SVM | 0.672 | 0.576 | 0.832 | 0.457 | 0.671 |
| GS_Des   | NB  | 0.646 | 0.561 | 0.616 | 0.728 | 0.761 |
| GS_Des   | RF  | 0.662 | 0.614 | 0.784 | 0.395 | 0.716 |
| GS_Des   | ANN | 0.712 | 0.689 | 0.711 | 0.679 | 0.773 |
| GS_Des   | CT  | 0.580 | 0.621 | 0.590 | 0.407 | 0.659 |

---

**Supplemental Table 2: Compounds that contain the key substructures.**

The caption 1 means the compound is 2-hydroxyethan-1-aminium derivatives (containing substructure 1) and the caption 2 means the compound is N-ethyl-2-hydroxy-N-methylethan-1-aminium derivatives (containing substructure 2).

| Localized in lysosome                                                               |                                                                                     |                                                                                     |                                                                                     |                                                                                       |                                                                                       |          |
|-------------------------------------------------------------------------------------|-------------------------------------------------------------------------------------|-------------------------------------------------------------------------------------|-------------------------------------------------------------------------------------|---------------------------------------------------------------------------------------|---------------------------------------------------------------------------------------|----------|
| 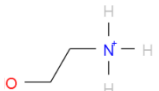   |    |    |    |    |    |          |
| No.                                                                                 | 1                                                                                   | 2                                                                                   | 3                                                                                   | 4                                                                                     | 5                                                                                     | 6        |
| Subs.                                                                               | (1)                                                                                 | (1)                                                                                 | (1)                                                                                 | (1)                                                                                   | (1)                                                                                   | (1)      |
|   |   |   |   |   |   |          |
| No.                                                                                 | 7                                                                                   | 8                                                                                   | 9                                                                                   | 10                                                                                    | 11                                                                                    | 12       |
| Subs                                                                                | (1)                                                                                 | (1), (2)                                                                            | (1)                                                                                 | (1), (2)                                                                              | (1)                                                                                   | (1)      |
|  |  |  |  |  |  |          |
| No.                                                                                 | 13                                                                                  | 14                                                                                  | 15                                                                                  | 16                                                                                    | 17                                                                                    | 18       |
| Subs                                                                                | (1)                                                                                 | (1)                                                                                 | (1), (2)                                                                            | (1)                                                                                   | (1), (2)                                                                              | (1)      |
|  |  |  |  |  |  |          |
| No.                                                                                 | 19                                                                                  | 20                                                                                  | 21                                                                                  | 22                                                                                    | 23                                                                                    | 24       |
| Subs                                                                                | (1), (2)                                                                            | (1), (2)                                                                            | (1)                                                                                 | (1), (2)                                                                              | (1)                                                                                   | (1), (2) |
|  |  |  |  |  |  |          |
| No.                                                                                 | 25                                                                                  | 26                                                                                  | 27                                                                                  | 28                                                                                    | 29                                                                                    | 30       |
| Subs                                                                                | (1)                                                                                 | (1)                                                                                 | (1)                                                                                 | (1)                                                                                   | (1)                                                                                   | (1)      |

|                               |                                                                                     |                                                                                     |                                                                                   |                                                                                    |                                                                                     |                                                                                     |
|-------------------------------|-------------------------------------------------------------------------------------|-------------------------------------------------------------------------------------|-----------------------------------------------------------------------------------|------------------------------------------------------------------------------------|-------------------------------------------------------------------------------------|-------------------------------------------------------------------------------------|
|                               | 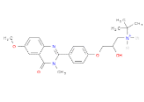   |    |  |  |  |  |
| No.                           | 31                                                                                  | 32                                                                                  | 33                                                                                | 34                                                                                 | 35                                                                                  | 36                                                                                  |
| Subs                          | (1)                                                                                 | (1)                                                                                 | (1), (2)                                                                          | (1)                                                                                | (1)                                                                                 | (1)                                                                                 |
| Localized in other organelles |                                                                                     |                                                                                     |                                                                                   |                                                                                    |                                                                                     |                                                                                     |
|                               |    |    |  |  |  |  |
| No.                           | 37                                                                                  | 38                                                                                  | 39                                                                                | 40                                                                                 | 41                                                                                  | 42                                                                                  |
| Subs                          | (1)                                                                                 | (1)                                                                                 | (1)                                                                               | (1)                                                                                | (1)                                                                                 | (1)                                                                                 |
| Loc.                          | Mito.                                                                               | Mito.                                                                               | Mito.                                                                             | Mito.                                                                              | Mito.                                                                               | Nucleus                                                                             |
|                               |    |    |  |  |  |  |
| No.                           | 43                                                                                  | 44                                                                                  | 45                                                                                | 46                                                                                 | 47                                                                                  | 48                                                                                  |
| Subs                          | (1)                                                                                 | (1)                                                                                 | (1)                                                                               | (1)                                                                                | (1)                                                                                 | (1)                                                                                 |
| Loc                           | Nucleus                                                                             | Nucleus                                                                             | Nucleus                                                                           | Nucleus                                                                            | Plasma mem.                                                                         | Plasma mem.                                                                         |
|                               |  |  |                                                                                   |                                                                                    |                                                                                     |                                                                                     |
| No.                           | 49                                                                                  | 50                                                                                  |                                                                                   |                                                                                    |                                                                                     |                                                                                     |
| Subs                          | (1)                                                                                 | (1)                                                                                 |                                                                                   |                                                                                    |                                                                                     |                                                                                     |
| Loc.                          | Plasma mem.                                                                         | Plasma mem.                                                                         |                                                                                   |                                                                                    |                                                                                     |                                                                                     |

## Supplemental Figure S1

|                                                                                     |                                                                                     |                                                                                     |                                                                                      |                                                                                       |
|-------------------------------------------------------------------------------------|-------------------------------------------------------------------------------------|-------------------------------------------------------------------------------------|--------------------------------------------------------------------------------------|---------------------------------------------------------------------------------------|
| 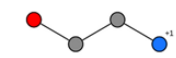   |    |    |    |    |
| No. 1 Lysosome                                                                      | No.2 Lysosome                                                                       | No.3 Mitochondria                                                                   | No.4 Mitochondria                                                                    | No.5 Mitochondria                                                                     |
| <chem>OCC[N+]</chem>                                                                | <chem>CC[NH+](C)CCO</chem>                                                          | <chem>CN(C)c1ccc(cc1)Cc1ccccc1</chem>                                               | <chem>[P+](c1ccccc1)(c1ccccc1)</chem>                                                | <chem>n1c(CC)ccc1C</chem>                                                             |
|    |    |    |    |    |
| No.6 Mitochondria                                                                   | No.7 Nucleus                                                                        | No.8 Nucleus                                                                        | No.9 Nucleus                                                                         | No.10 Nucleus                                                                         |
| <chem>C(C)C(=CC(=O))</chem>                                                         | <chem>CCl</chem>                                                                    | <chem>c1ccc(cc1)c1ccc(o1)</chem>                                                    | <chem>n1c(C)cccc1C</chem>                                                            | <chem>c1[nH]c2cc(ccc2n1)N1CCN(CC1)C</chem>                                            |
|    |    |    |    |    |
| No.11 Nucleus                                                                       | No.12 Nucleus                                                                       | No.13 Nucleus                                                                       | No.14 Nucleus                                                                        | No.15 Plasma Membrane                                                                 |
| <chem>OCC(=O)NCCCCC</chem>                                                          | <chem>C[n+]1cc2ccccc2c2ccccc12</chem>                                               | <chem>N=C(c1ccc(cc1))N</chem>                                                       | <chem>c1csc(C)n1</chem>                                                              | <chem>CCCCN(CCC)c1ccccc1</chem>                                                       |
|    |    |    |    |    |
| No.16 Plasma Membrane                                                               | No.17 Plasma Membrane                                                               | No.18 Plasma Membrane                                                               | No.19 Plasma Membrane                                                                | No.20 Plasma Membrane                                                                 |
| <chem>c1ccc2cc(N)ccc2c1</chem>                                                      | <chem>CCCCc1ccc2c(Cc3ccccc23)c1</chem>                                              | <chem>c1csc(c1)</chem>                                                              | <chem>CCS(=O)(=O)</chem>                                                             | <chem>C=Cc1cc[n+](CCC[N+](C)(C)C)c1</chem>                                            |
|  |  |  |  |  |
| No.21 Lysosome                                                                      | No.22 Mitochondria                                                                  | No.23 Mitochondria                                                                  | No.24 Mitochondria                                                                   | No.25 Plasma membrane                                                                 |
| <chem>NC1(CCCCC1)C</chem>                                                           | <chem>Oc1ccc(Cl)cc1</chem>                                                          | <chem>C(=O)Nc1ccc(Cl)cc1</chem>                                                     | <chem>[O-]C(=O)CCCCCCCCCCCC</chem>                                                   | <chem>S(=O)(=O)c1ccc(cc1)N1CCC(=N1)</chem>                                            |

**Figure S1.** The significant substructures drawn by SMARTSviewer. The numeric orders are corresponding to the **Table 6** and **Table 7**.
